# Supplementary material for: Saccharomonopyrones A–C, New α-Pyrones from a Marine Sediment-Derived Bacterium Saccharomonospora sp. CNQ-490
Source: PubMed Central journal article supplement (PMC5577594; doi:10.3390/md15080239), 2017-08-01
Supplement: marinedrugs-15-00239-s001.pdf [file marinedrugs-15-00239-s001.pdf]

*Supporting Information for*

# **Saccharomonopyrones A - C, New $\alpha$ -Pyrones from a Marine Sediment-Derived Bacterium *Saccharomonospora* sp. CNQ-490**

**Chae-Yoon Yim <sup>1,†</sup>, Tu Cam Le <sup>1,†</sup>, Tae Gu Lee <sup>2,†</sup>, Inho Yang <sup>1</sup>, Hansol Choi <sup>1</sup>, Jusung Lee <sup>2</sup>, Kyung-Yun Kang <sup>3</sup>, Jin Sil Lee <sup>4</sup>, Kyung-Min Lim <sup>4</sup>, Sung-Tae Yee <sup>3</sup>, Heonjoong Kang <sup>2,5,\*</sup>, Sang-Jip Nam <sup>1,\*</sup> and William Fenical <sup>6,\*</sup>**

<sup>1</sup> Department of Chemistry and Nanoscience, Ewha Womans University, Seoul 03760, Republic of Korea

<sup>2</sup> School of Earth and Environmental Sciences, Seoul National University, NS-80, Seoul 08826, Republic of Korea

<sup>3</sup> College of Pharmacy, Suncheon National University, Suncheon, 57922, Republic of Korea

<sup>4</sup> College of Pharmacy, Ewha Womans University, Seoul 03760, Republic of Korea

<sup>5</sup> Research Institute of Oceanography, Seoul National University, NS-80, Seoul 08826, Republic of Korea

<sup>6</sup> Center for Marine Biotechnology and Biomedicine, Scripps Institution of Oceanography, University of California-San Diego, La Jolla, CA 92093-0204, USA

\* Correspondence: hjkang@snu.ac.kr; Tel.: +81-2-880-5730 (H.K.) sjnam@ewha.ac.kr; Tel.: +82-10-5210-7715 (S.N.) wfenical@ucsd.edu; Tel: +1-858-259-3839 (W.F.)

## Table of Contents

|                                                                                                                     |     |
|---------------------------------------------------------------------------------------------------------------------|-----|
| <b>Figure S1.</b> $^1\text{H}$ NMR Spectrum (300 MHz) of saccharomonopyrone A ( <b>1</b> ) in DMSO- $d_6$ .....     | S3  |
| <b>Figure S2.</b> $^{13}\text{C}$ NMR Spectrum (75 MHz) of saccharomonopyrone A ( <b>1</b> ) in DMSO- $d_6$ .....   | S4  |
| <b>Figure S3.</b> gCOSY Spectra (500 MHz) of saccharomonopyrone A ( <b>1</b> ) in DMSO - $d_6$ .....                | S5  |
| <b>Figure S4.</b> gHSQC Spectra (500 MHz) of saccharomonopyrone A ( <b>1</b> ) in DMSO - $d_6$ .....                | S6  |
| <b>Figure S5.</b> gHMBC Spectra (500 MHz) of saccharomonopyrone A ( <b>1</b> ) in DMSO - $d_6$ .....                | S7  |
| <b>Figure S6.</b> $^1\text{H}$ NMR Spectrum (300 MHz) of of saccharomonopyrone B ( <b>2</b> ) in DMSO - $d_6$ ..... | S8  |
| <b>Figure S7.</b> $^{13}\text{C}$ NMR Spectrum (75 MHz) of saccharomonopyrone B ( <b>2</b> ) in DMSO - $d_6$ .....  | S9  |
| <b>Figure S8.</b> gCOSY Spectra (500 MHz) of saccharomonopyrone A ( <b>2</b> ) in DMSO - $d_6$ .....                | S10 |
| <b>Figure S9.</b> gHSQC Spectra (500 MHz) of saccharomonopyrone A ( <b>2</b> ) in DMSO - $d_6$ .....                | S11 |
| <b>Figure S10.</b> gHMBC Spectra (500 MHz) of saccharomonopyrone A ( <b>2</b> ) in DMSO - $d_6$ .....               | S12 |
| <b>Figure S11.</b> $^1\text{H}$ NMR Spectrum (300 MHz) of saccharomonopyrone C ( <b>3</b> ) in DMSO - $d_6$ .....   | S13 |
| <b>Figure S12.</b> $^{13}\text{C}$ NMR Spectrum (75 MHz) of saccharomonopyrone C ( <b>3</b> ) in DMSO - $d_6$ ..... | S14 |
| <b>Figure S13.</b> gCOSY Spectra (500 MHz) of saccharomonopyrone A ( <b>3</b> ) in DMSO - $d_6$ .....               | S15 |
| <b>Figure S14.</b> gHSQC Spectra (500 MHz) of saccharomonopyrone A ( <b>3</b> ) in DMSO - $d_6$ .....               | S16 |
| <b>Figure S15.</b> gHMBC Spectra (500 MHz) of saccharomonopyrone A ( <b>3</b> ) in DMSO - $d_6$ .....               | S17 |
| <b>Figure S16.</b> UV spectra of Saccharomonopyrones.....                                                           | S18 |

**Figure S1.**  $^1\text{H}$  NMR Spectrum (300 MHz) of Saccharomonopyrone A (**1**) in  $\text{DMSO-}d_6$

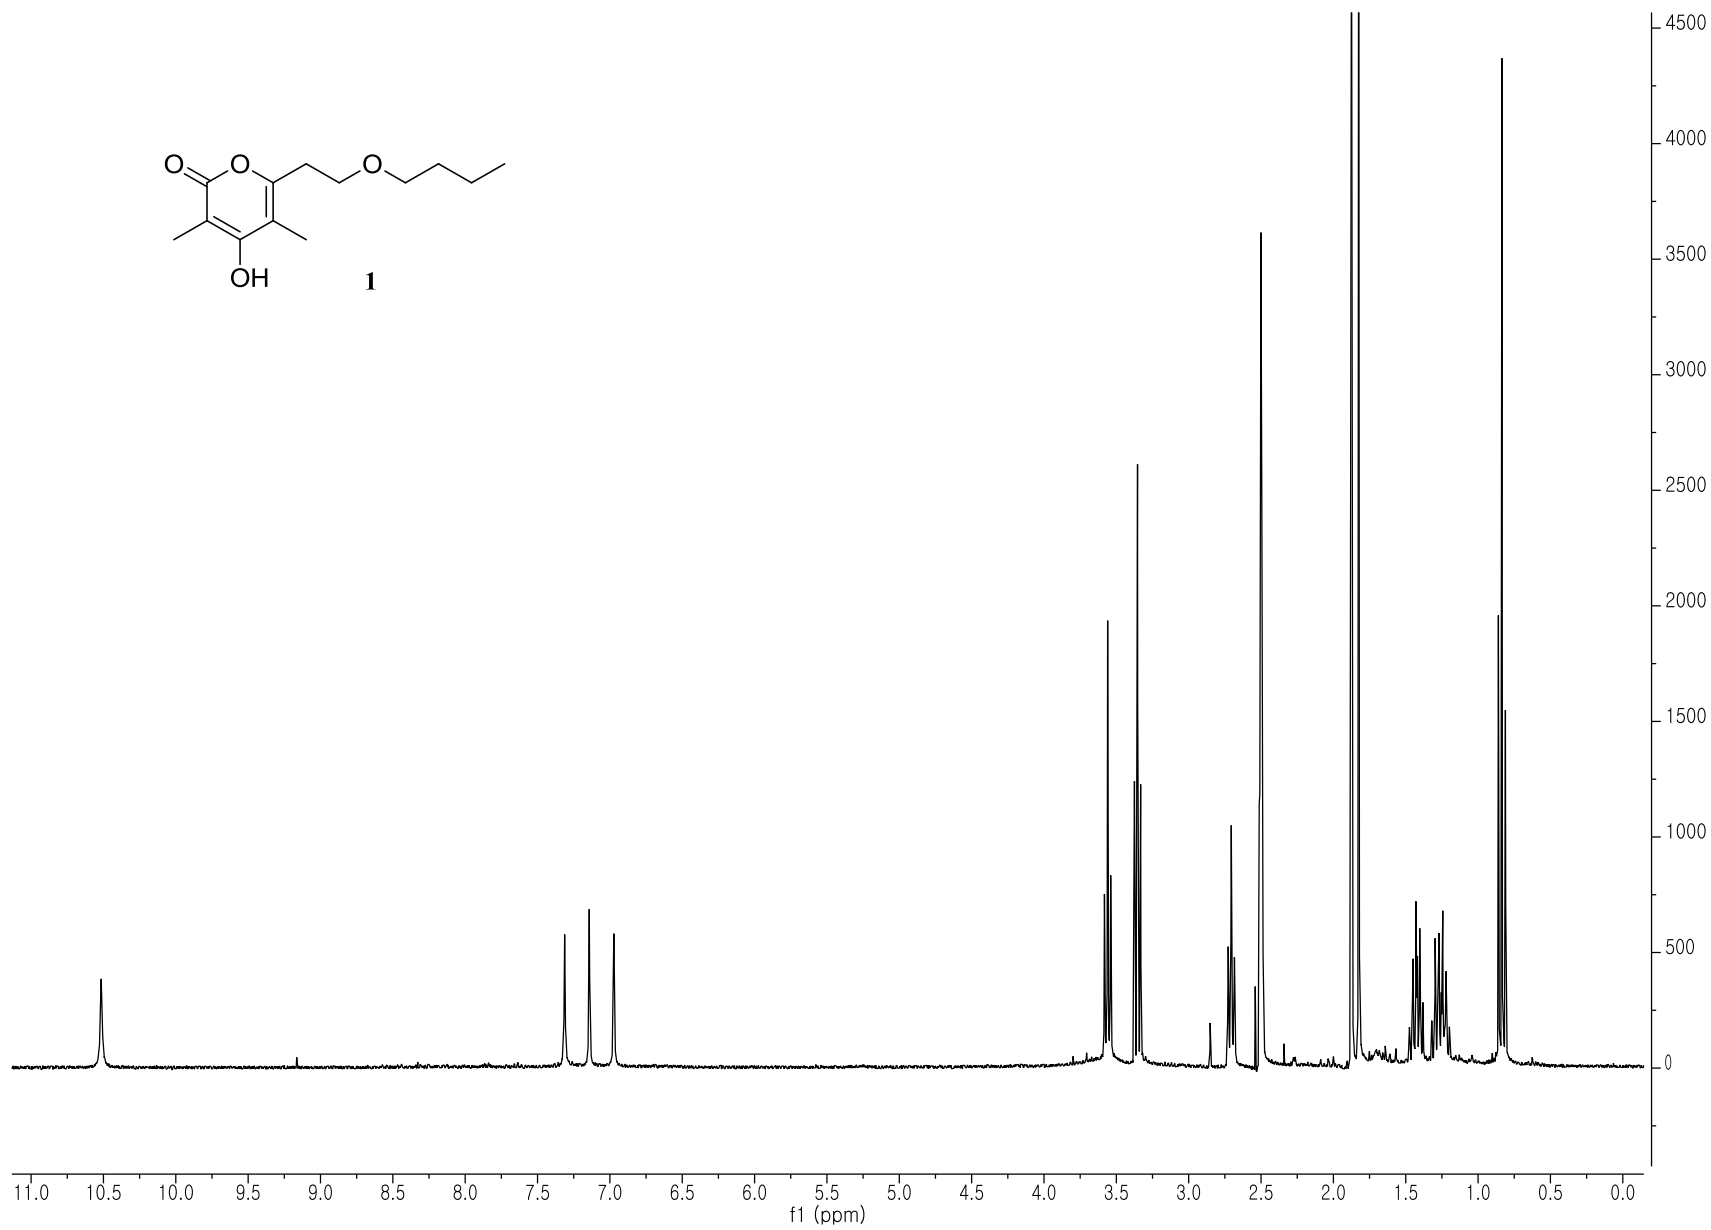

**Figure S2.**  $^{13}\text{C}$  NMR Spectrum (75 MHz) of Saccharomonopyrone A (**1**) in  $\text{DMSO-}d_6$

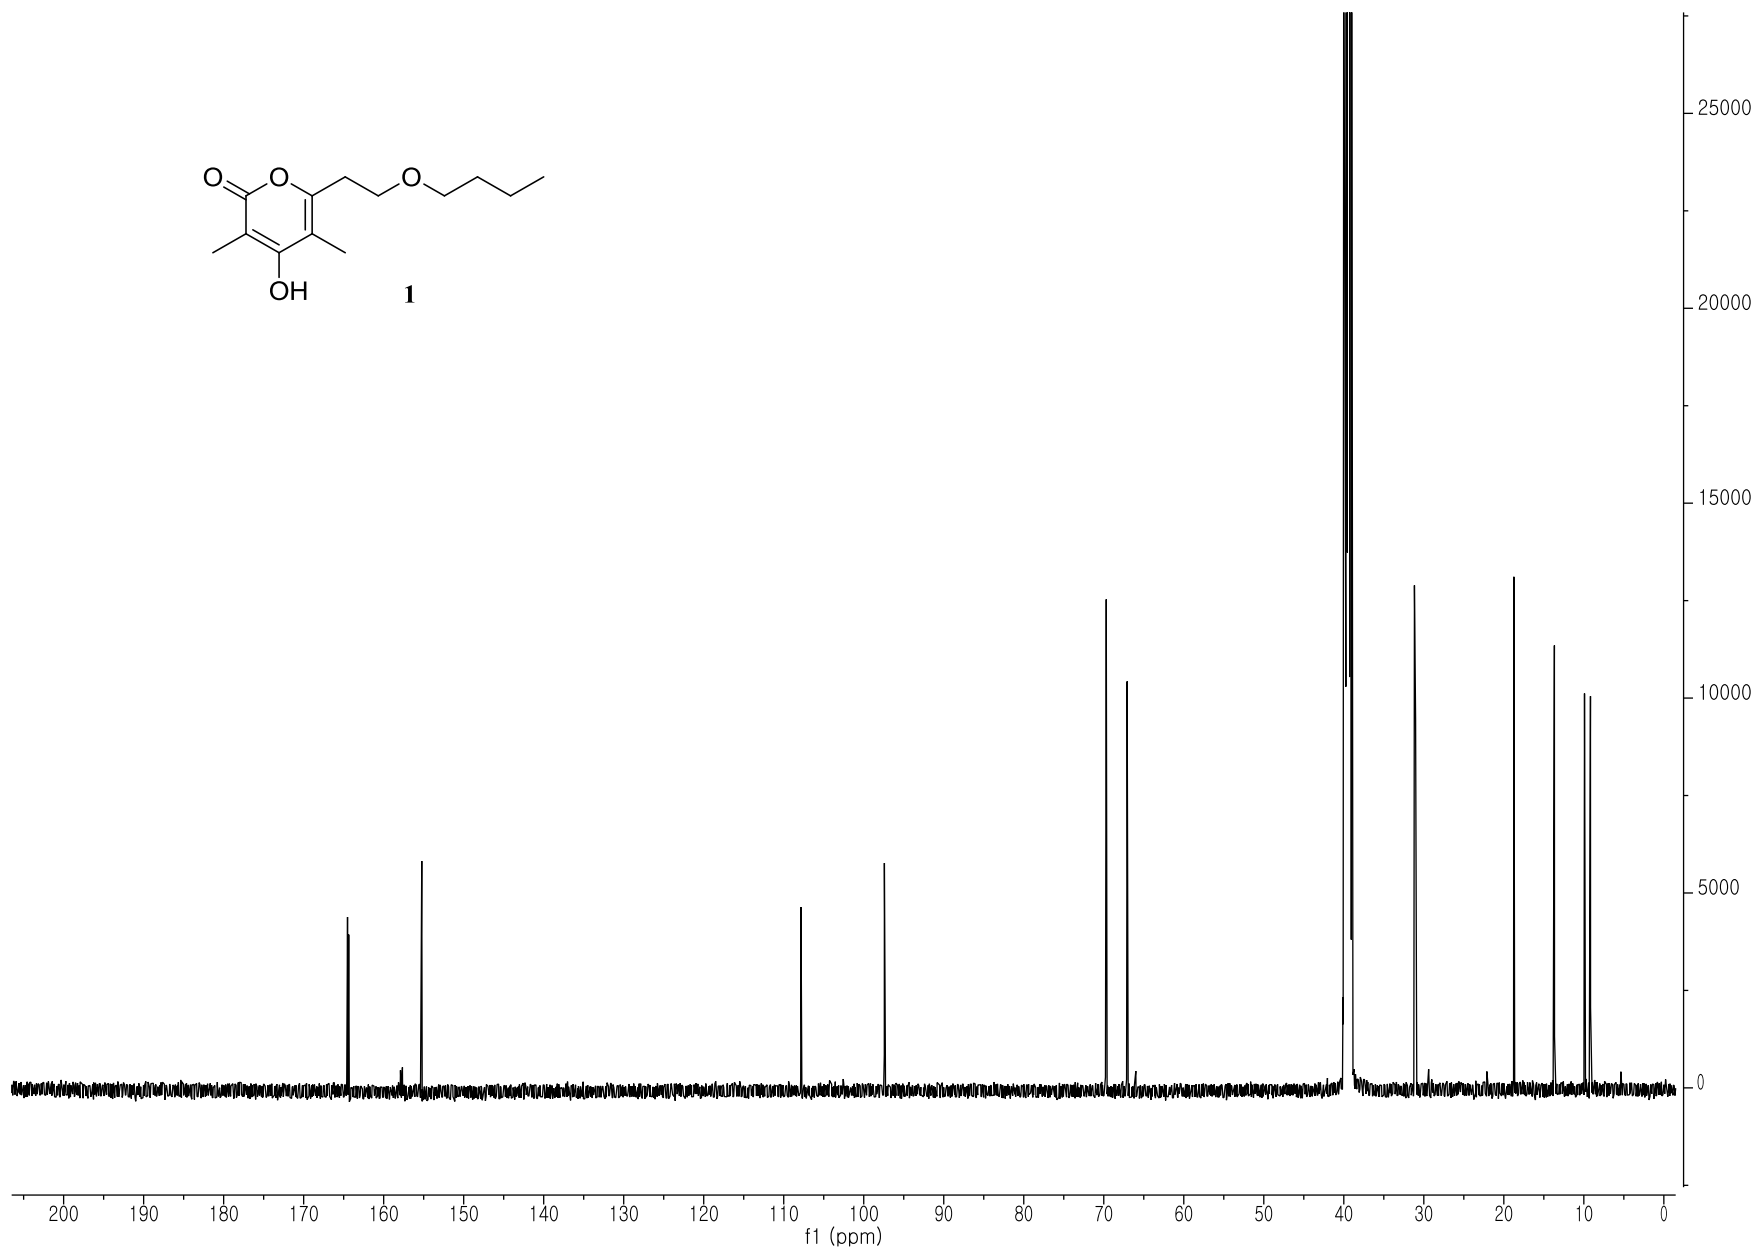

**Figure S3.** gCOSY Spectra (500 MHz) of Saccharomonopyrone A (**1**) in DMSO- $d_6$

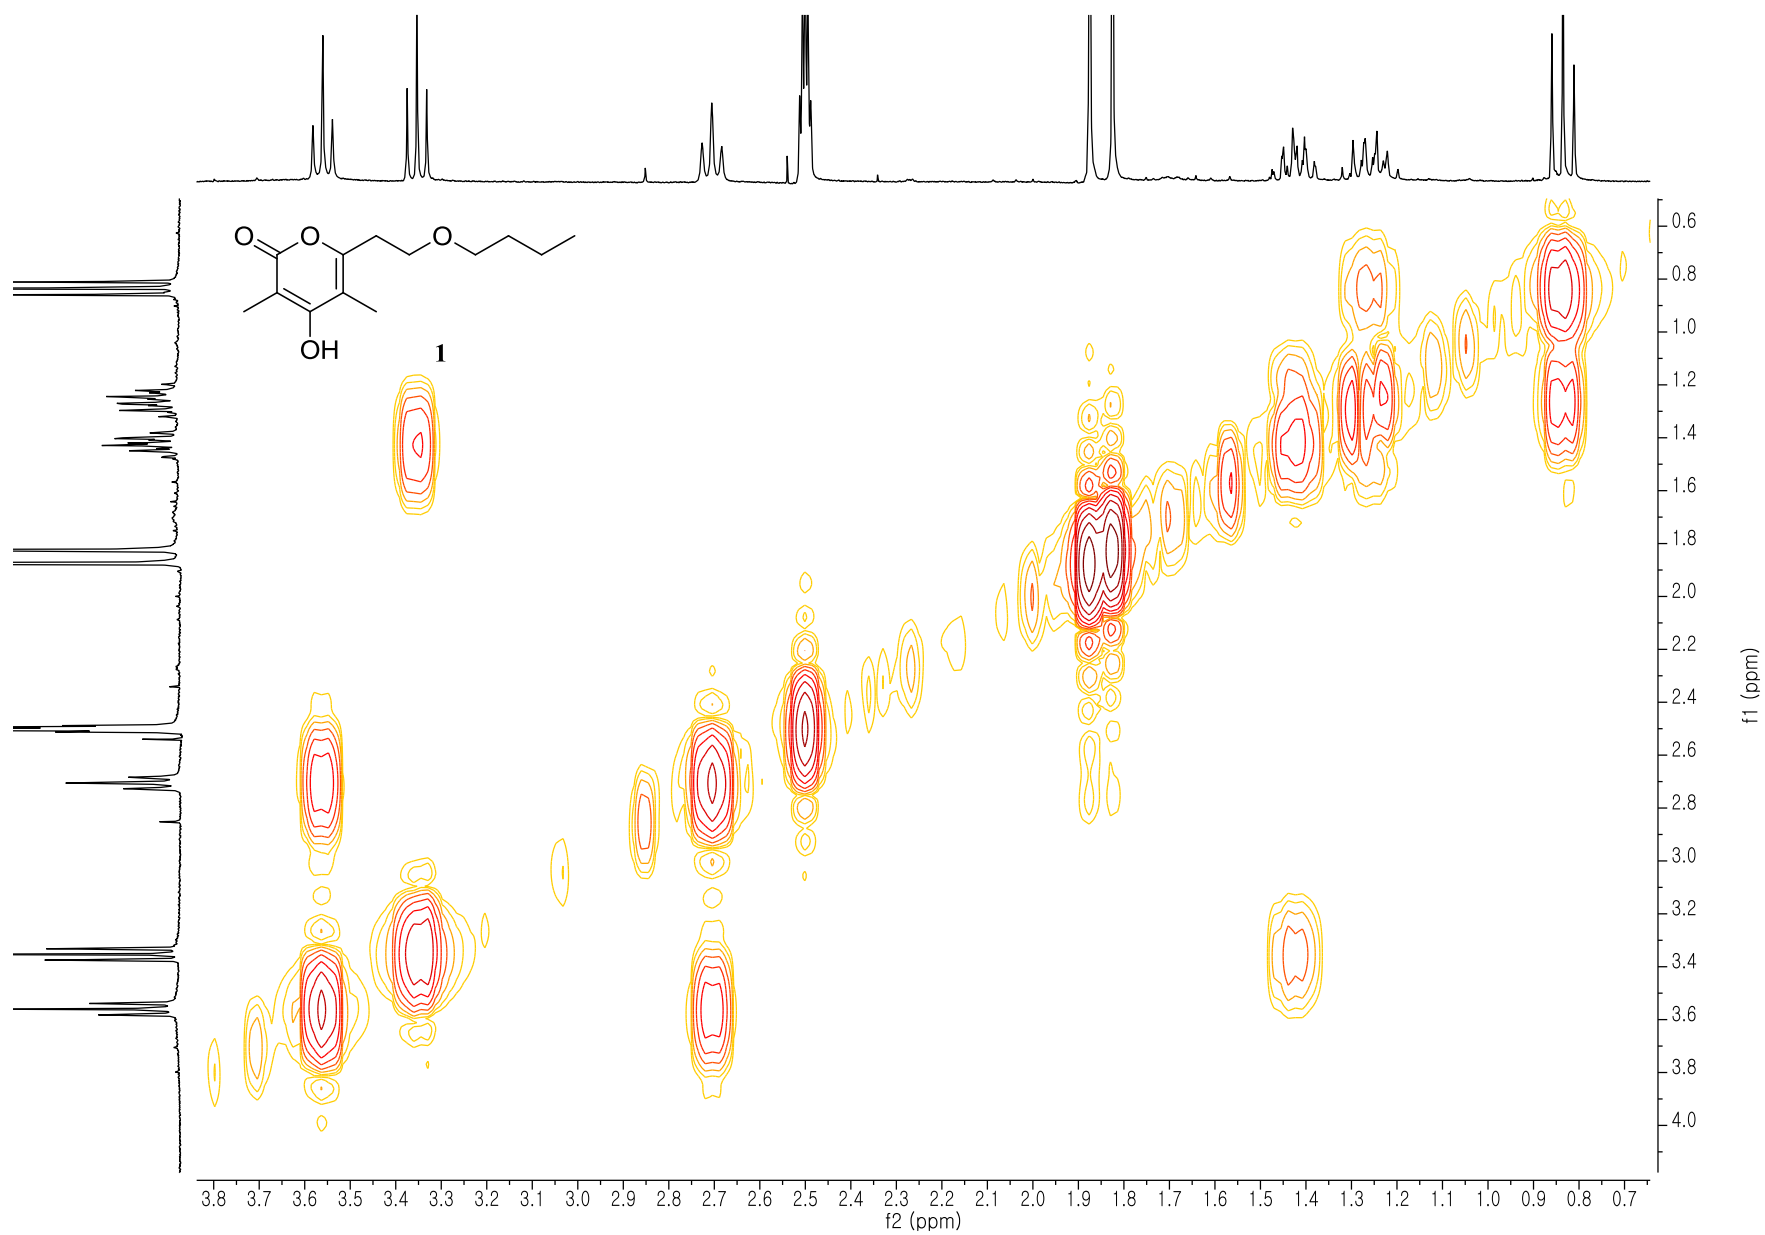

**Figure S4.** gHSQC Spectra (500 MHz) of Saccharomonopyrone A (**1**) in DMSO- $d_6$

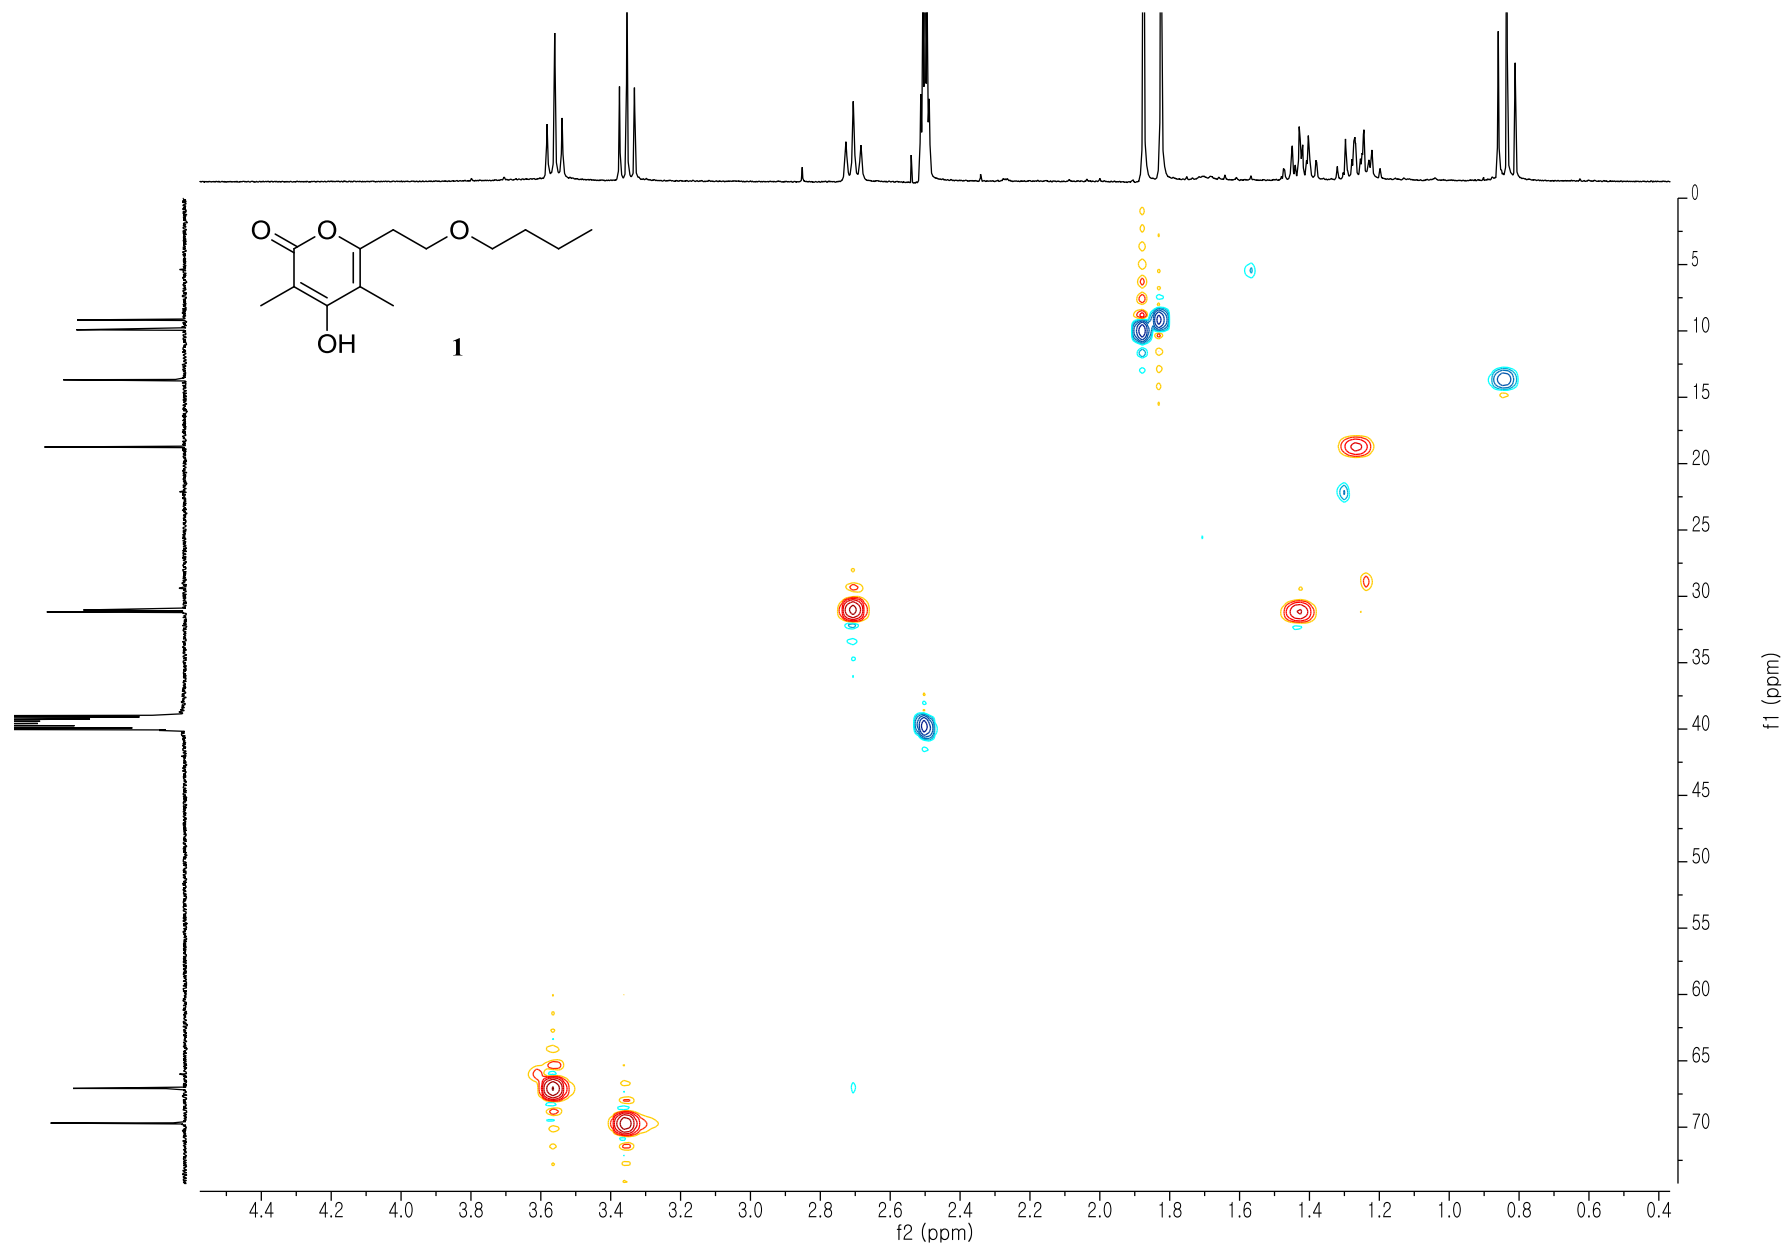

**Figure S5.** gHMBC Spectra (500 MHz) of Saccharomonopyrone A (**1**) in DMSO-*d*<sub>6</sub>

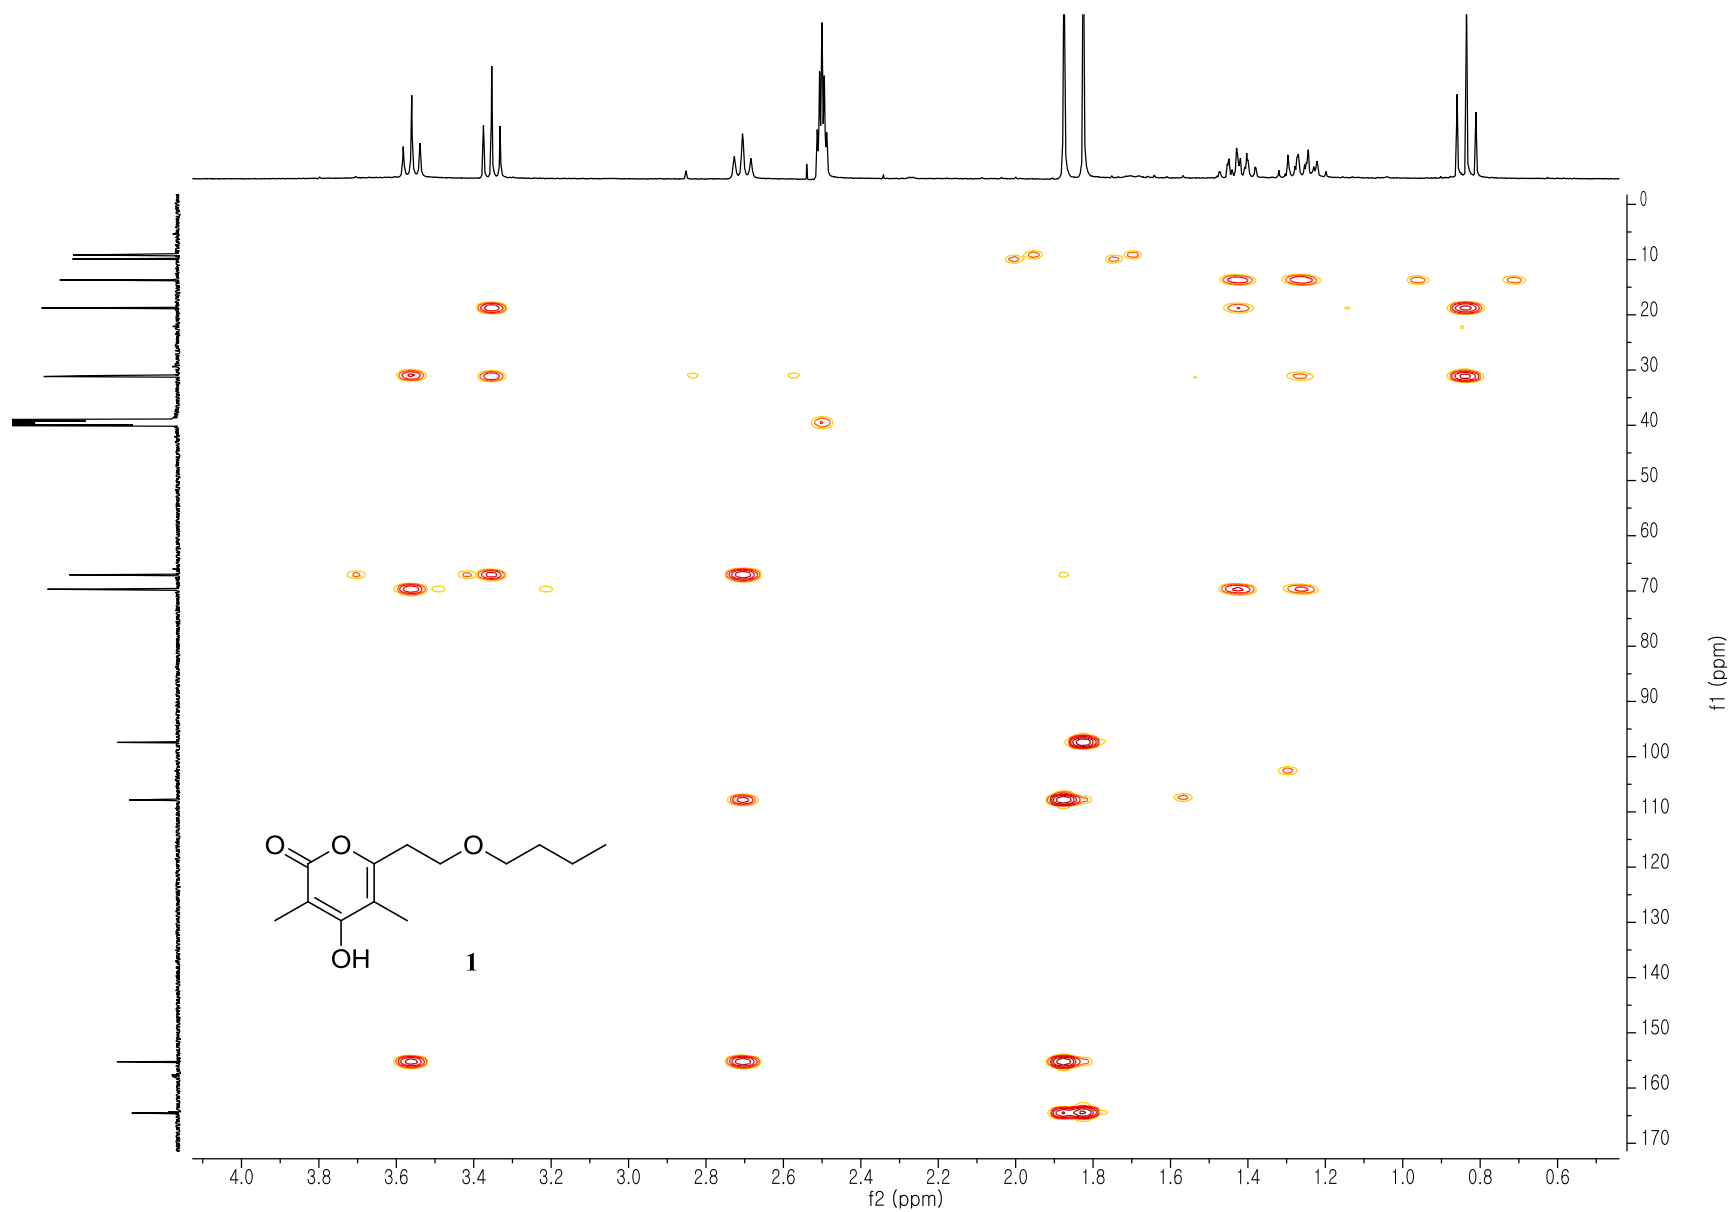

**Figure S6.**  $^1\text{H}$  NMR Spectrum (300 MHz) of Saccharomonopyrone B (**2**) in  $\text{DMSO-}d_6$

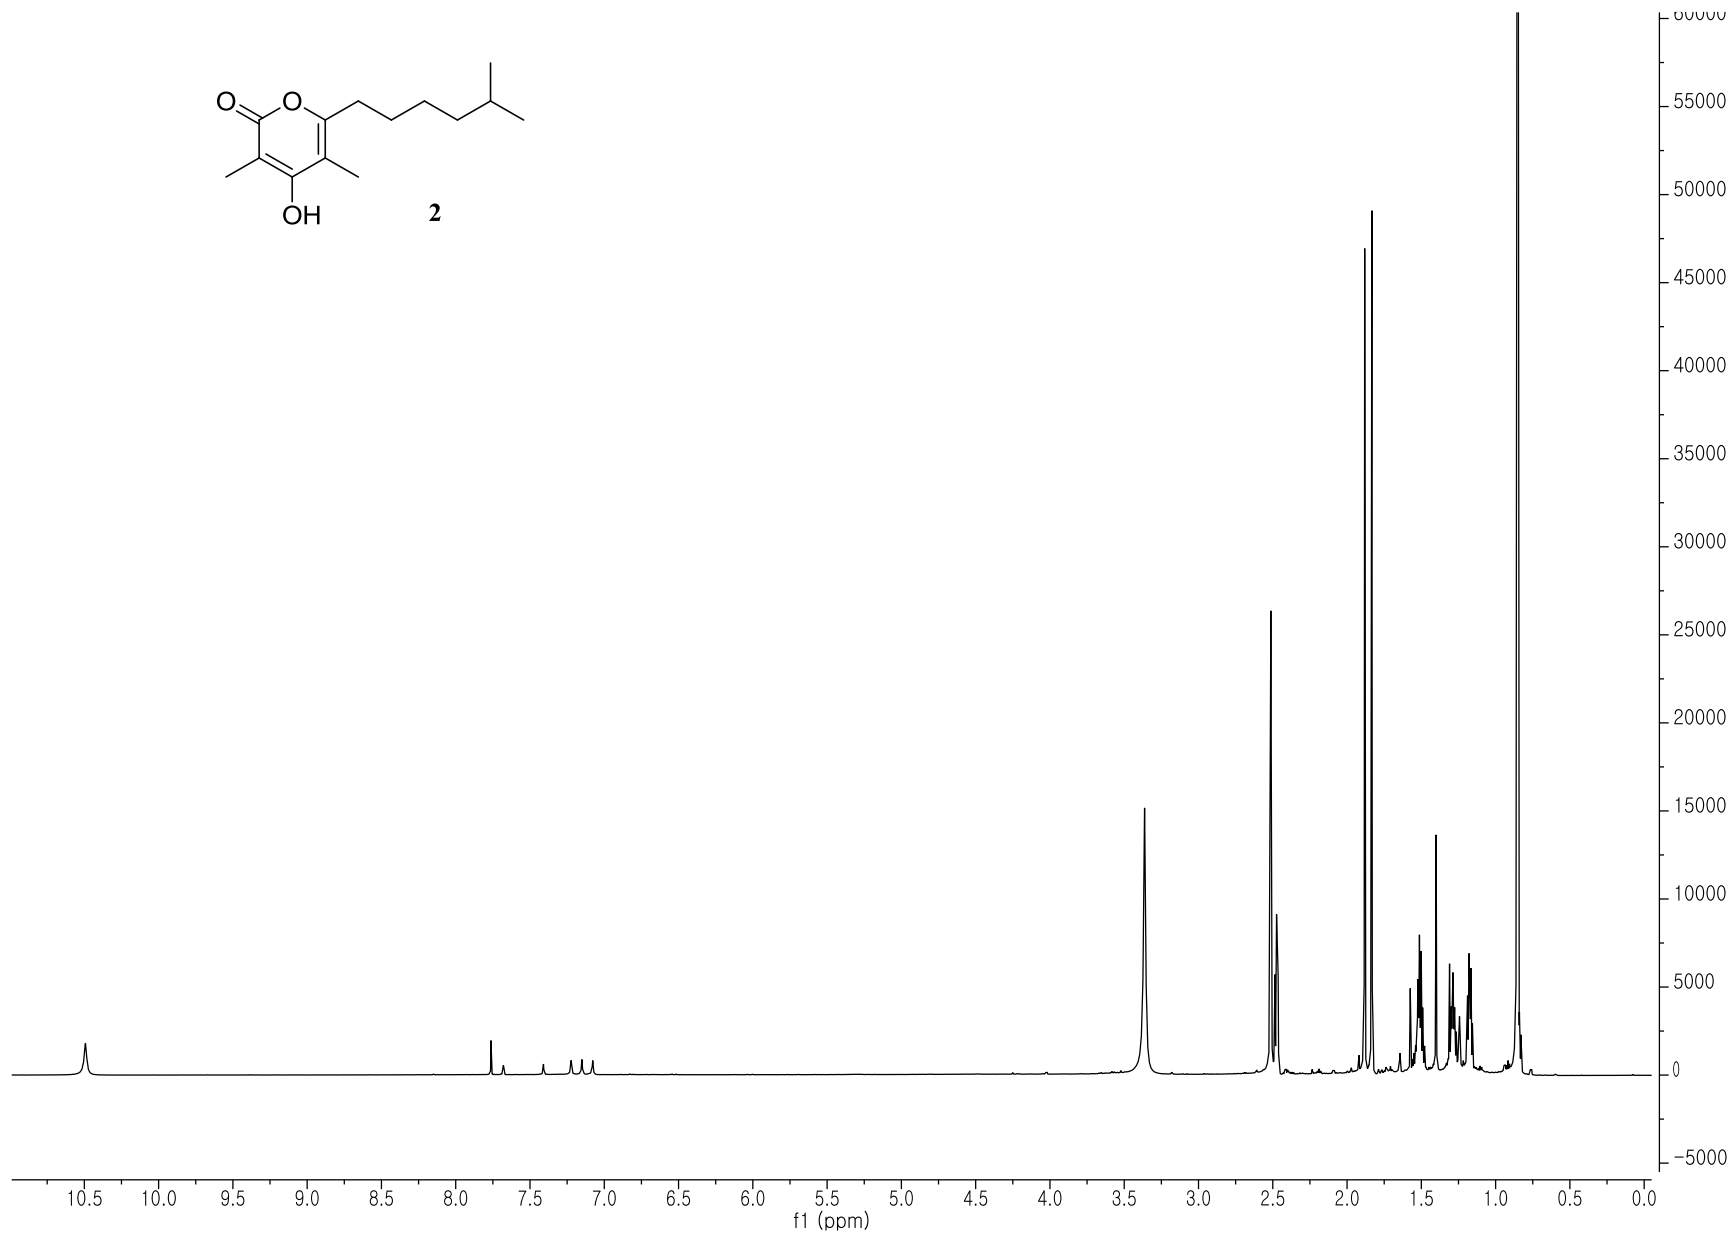



**Figure S7.**  $^{13}\text{C}$  NMR Spectrum (75 MHz) of Saccharomonopyrone B (**2**) in  $\text{DMSO-}d_6$

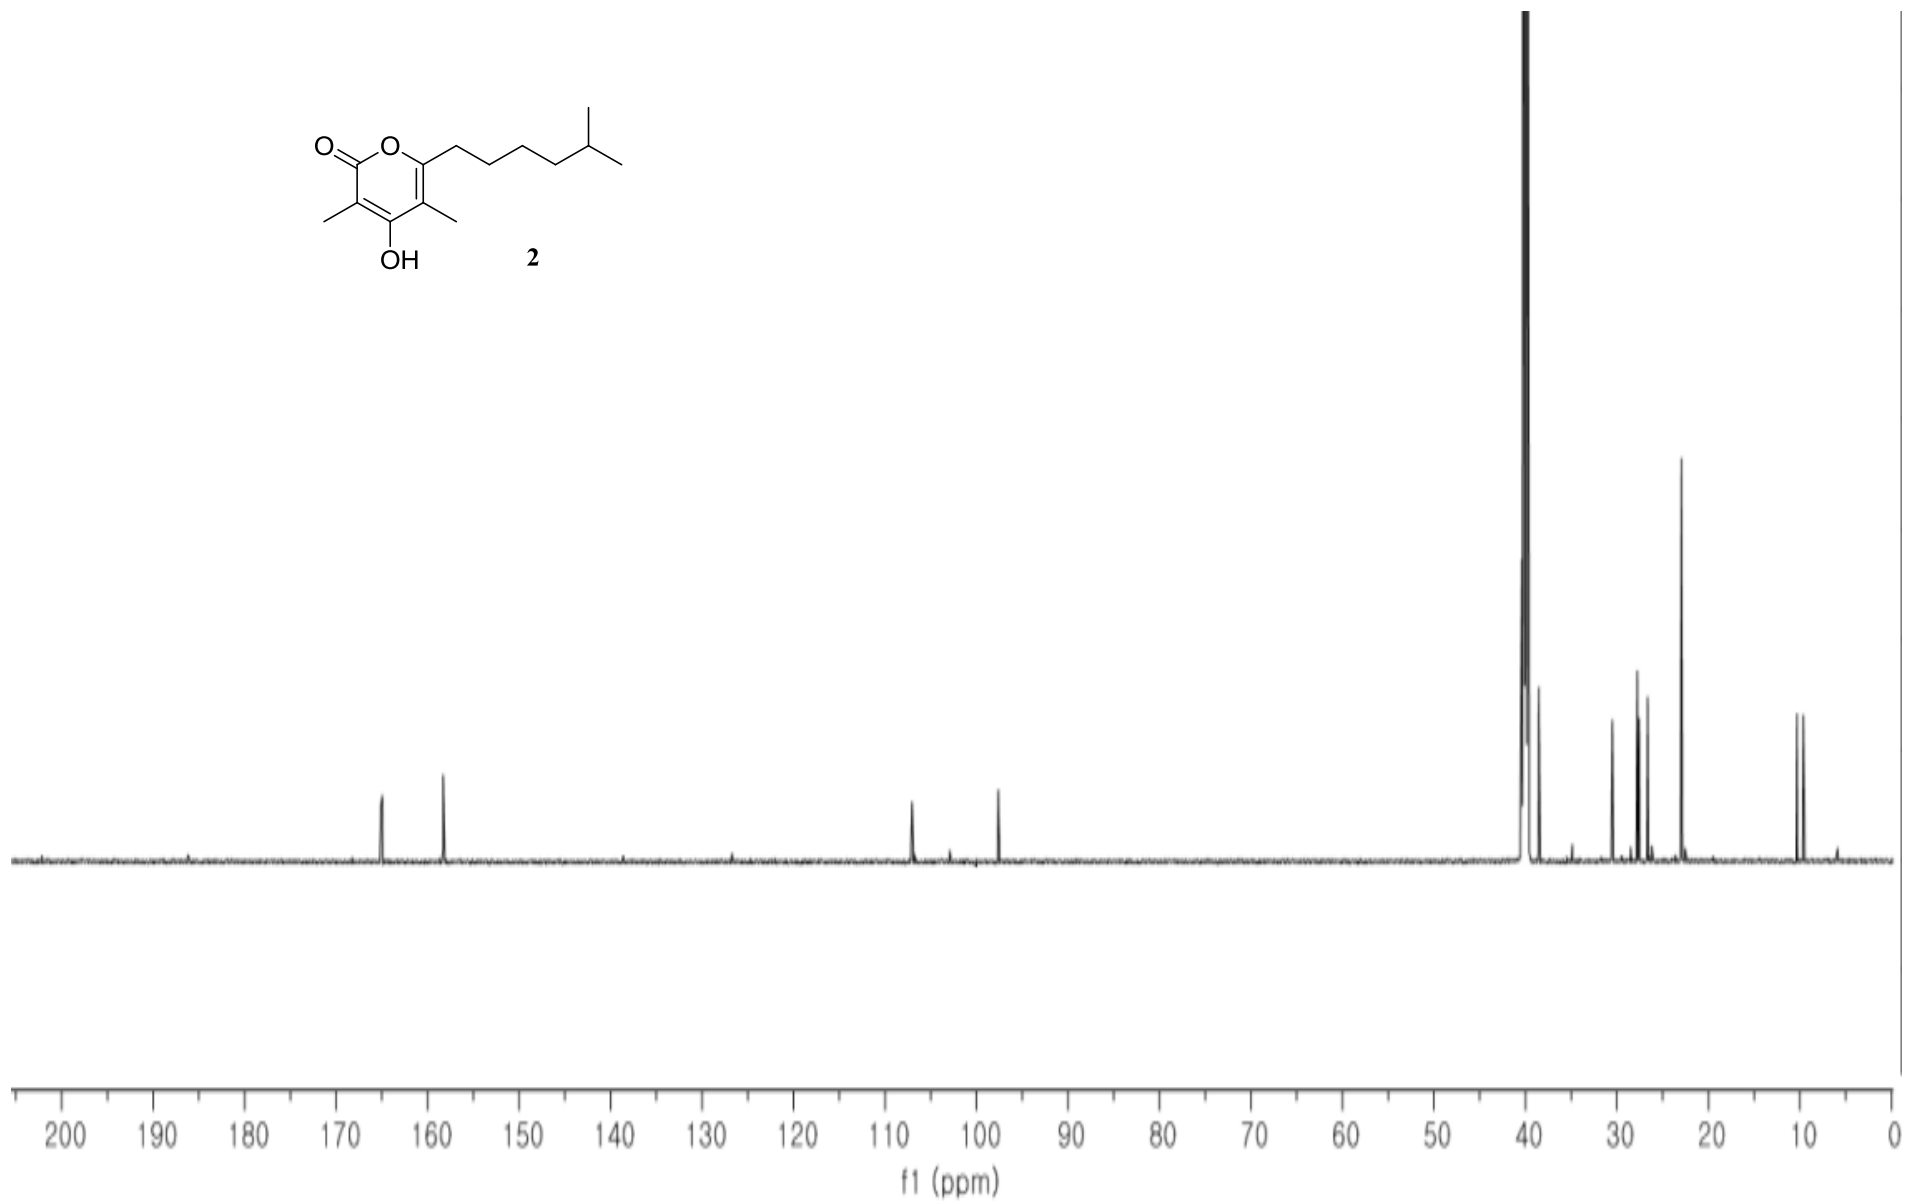

**Figure S8.** gCOSY Spectra (500 MHz) of Saccharomonopyrone A (**2**) in DMSO-*d*<sub>6</sub>

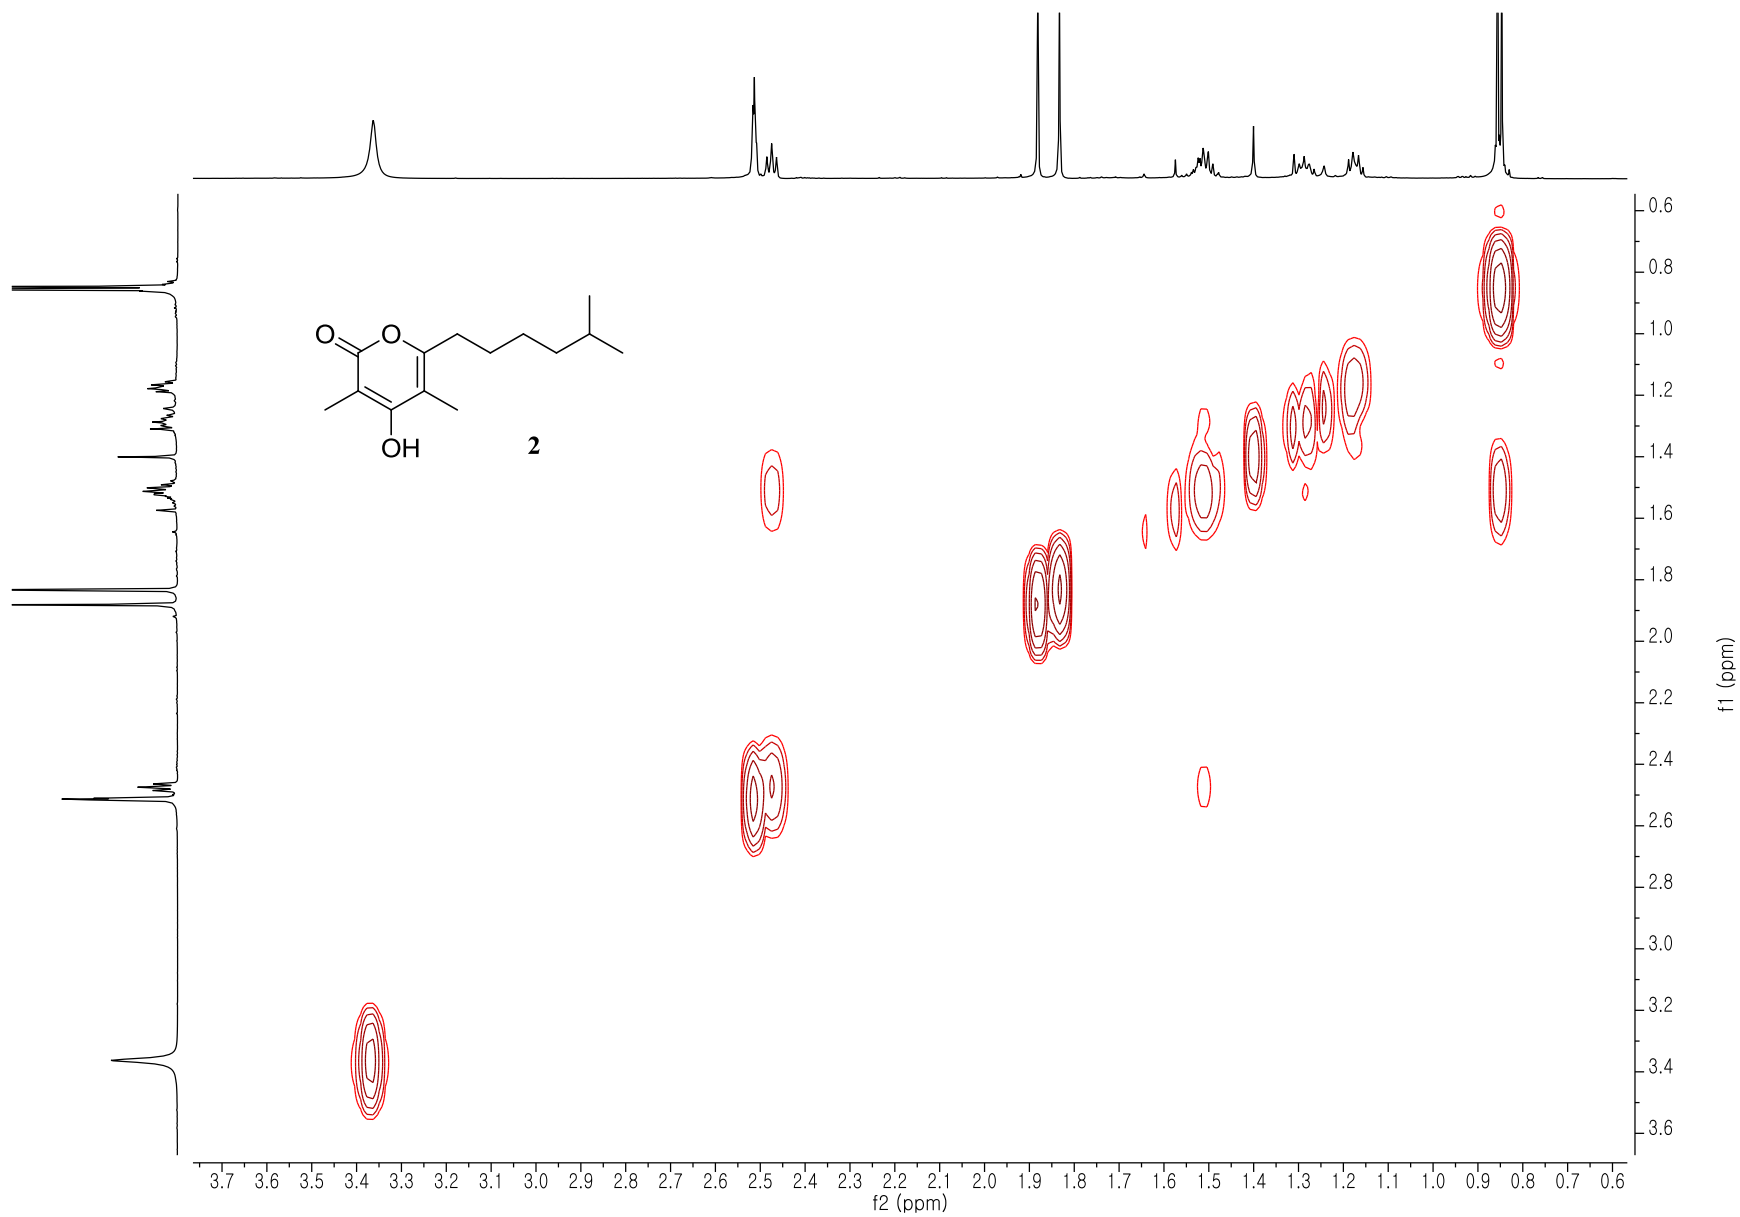

**Figure S9.** gHSQC Spectra (500 MHz) of Saccharomonopyrone A (**2**) in DMSO-*d*<sub>6</sub>

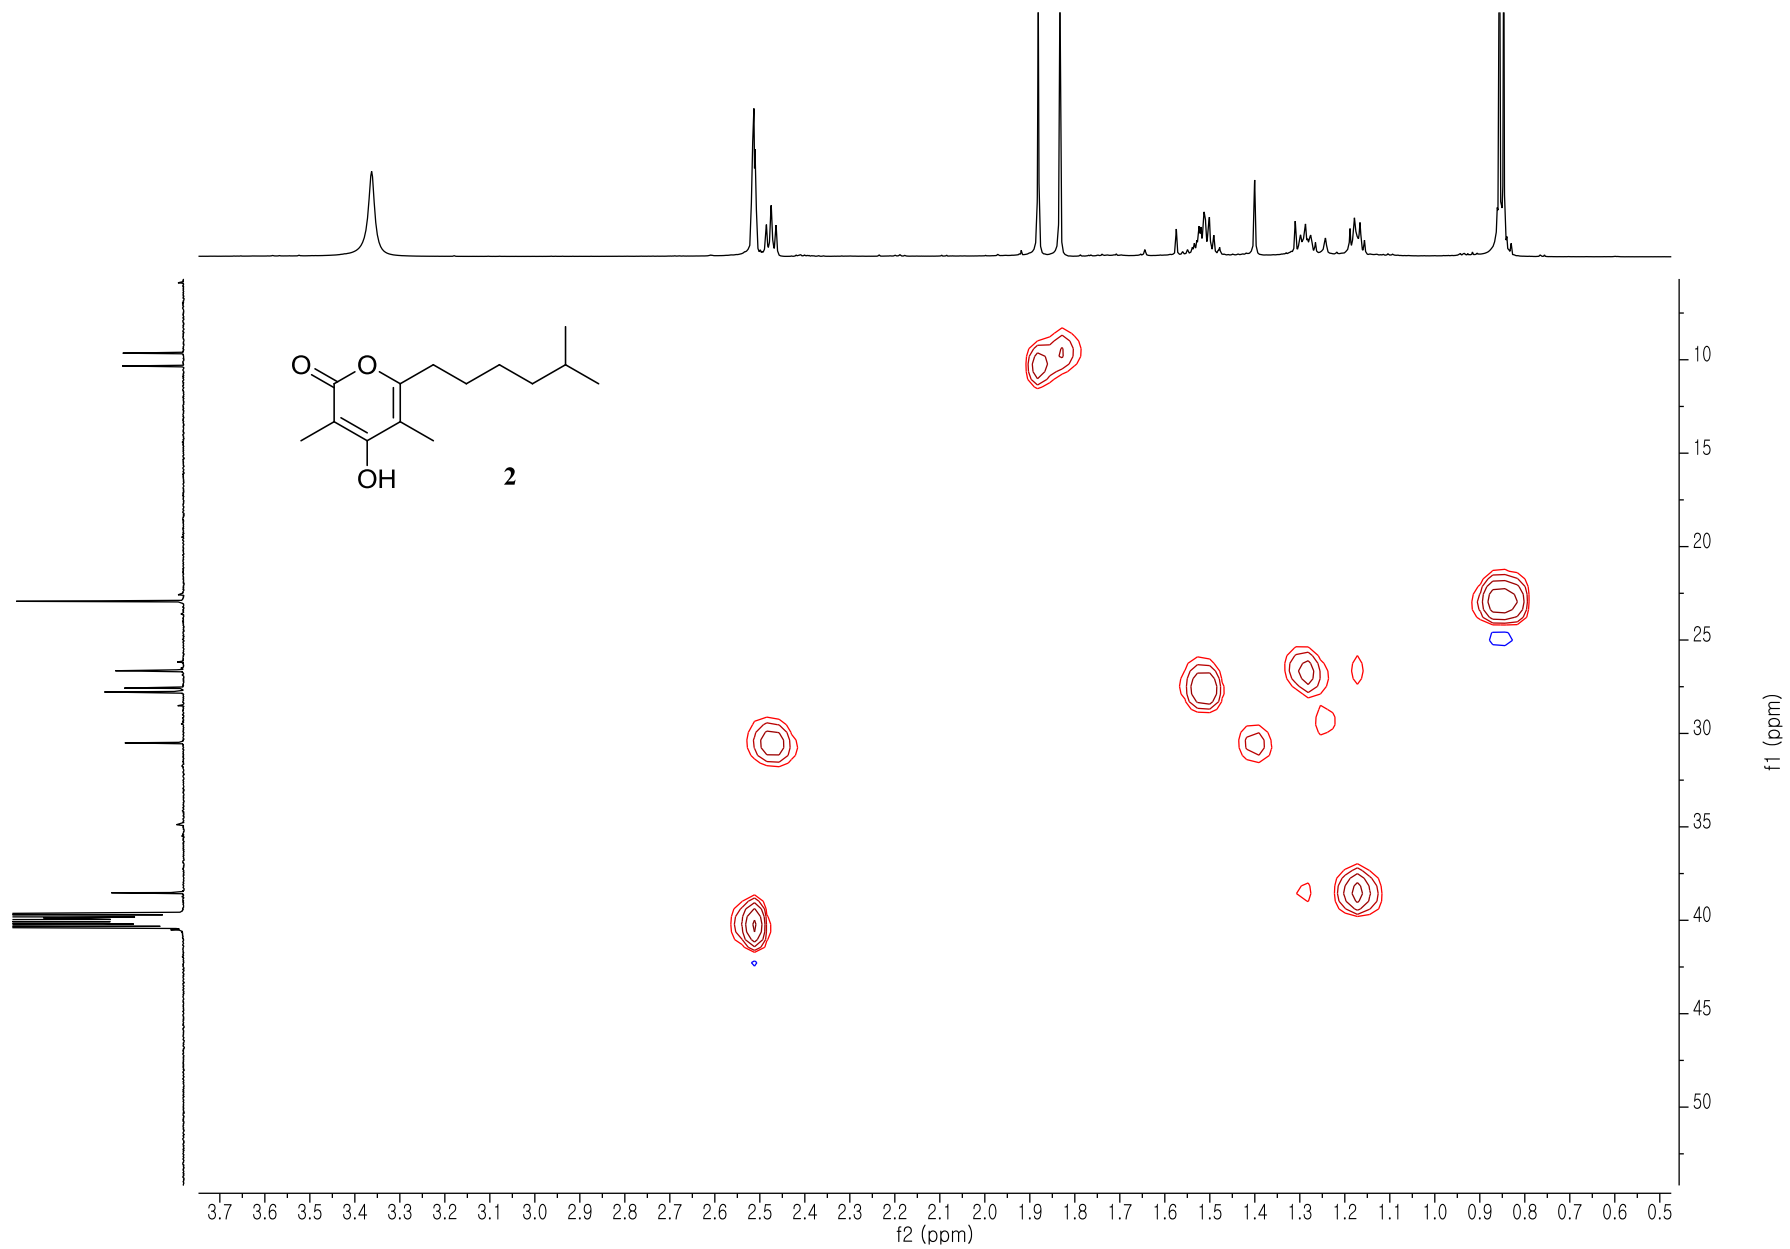

**Figure S10.** gHMBC Spectra (500 MHz) of Saccharomonopyrone A (**2**) in DMSO- $d_6$

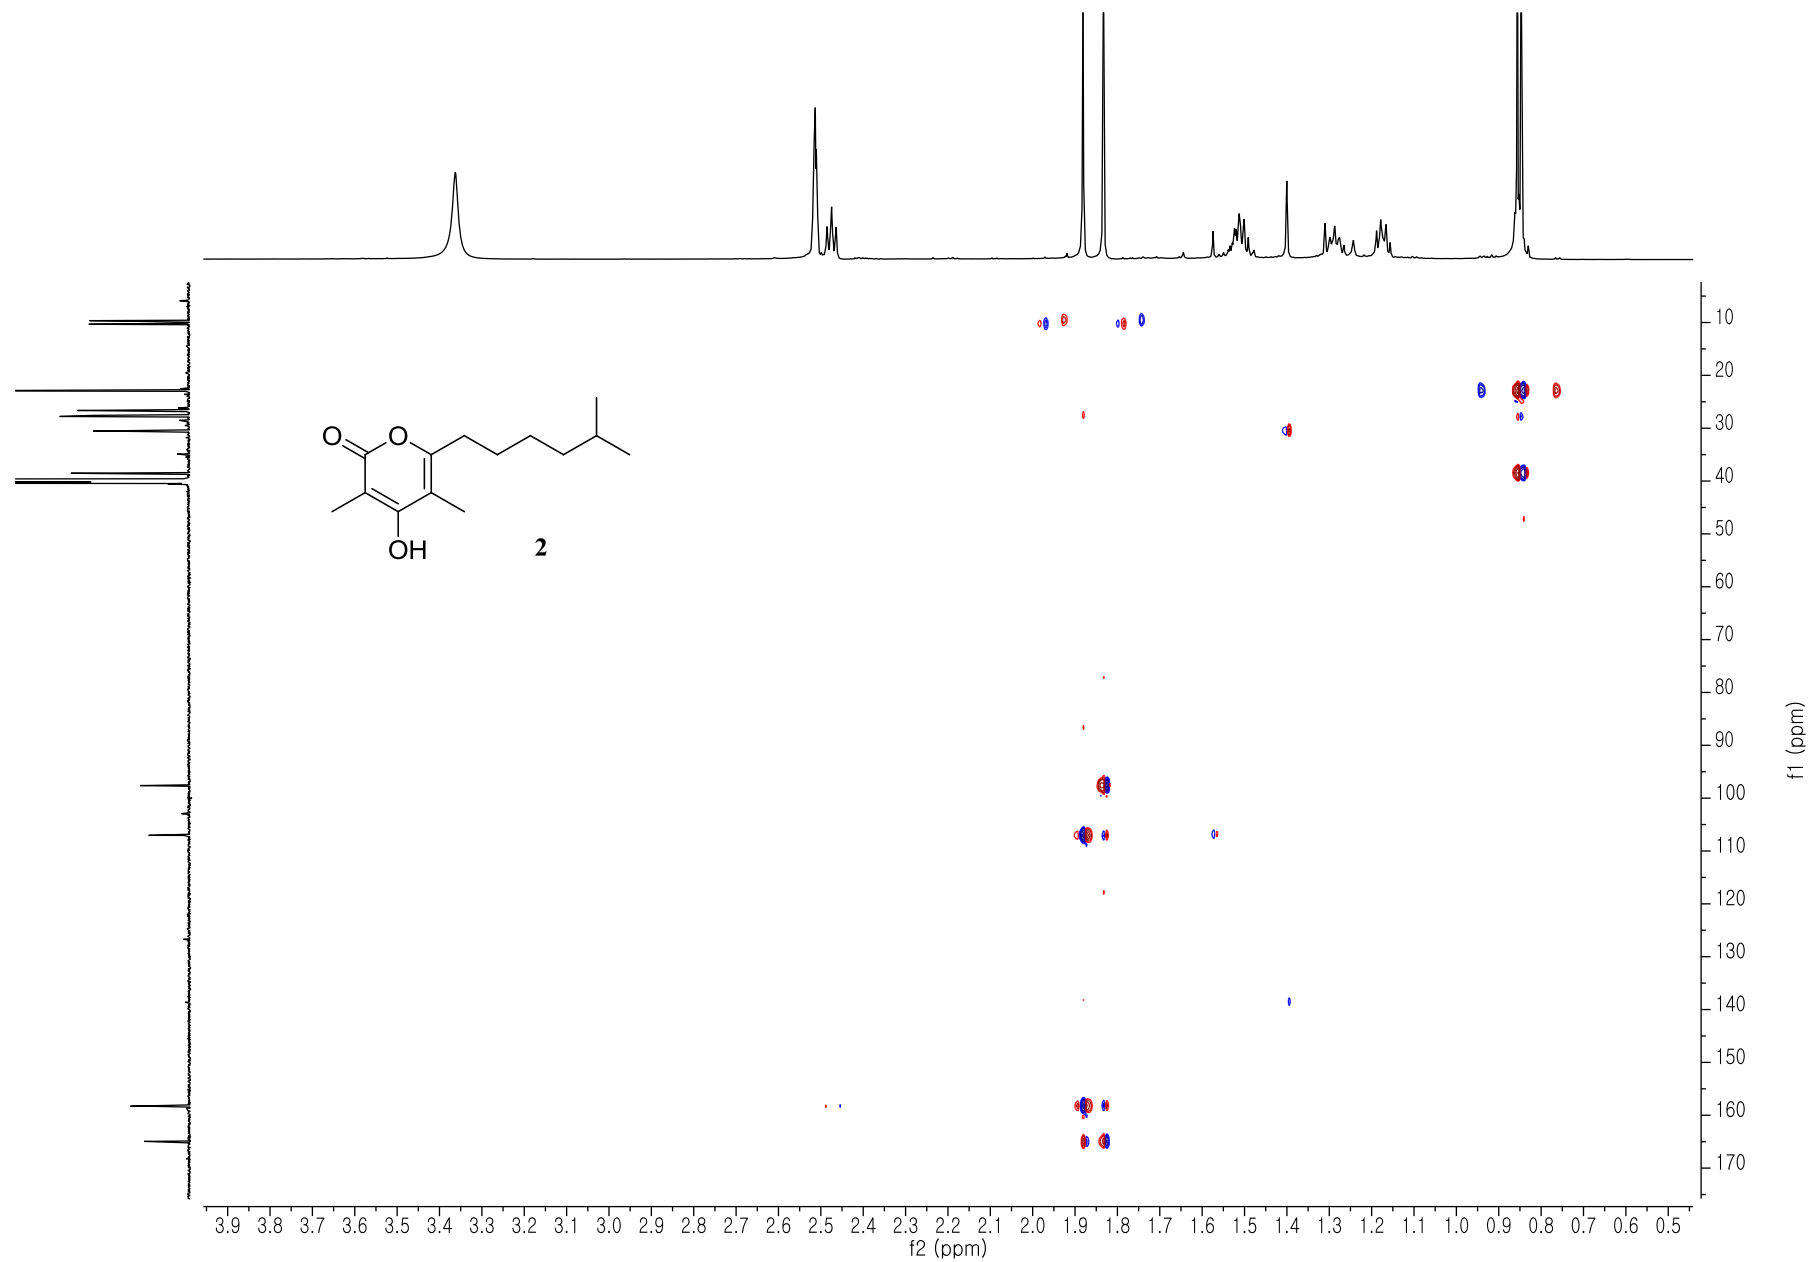

**Figure S11.**  $^1\text{H}$  NMR Spectrum (300 MHz) of Saccharomonopyrone C (**3**) in  $\text{DMSO-}d_6$

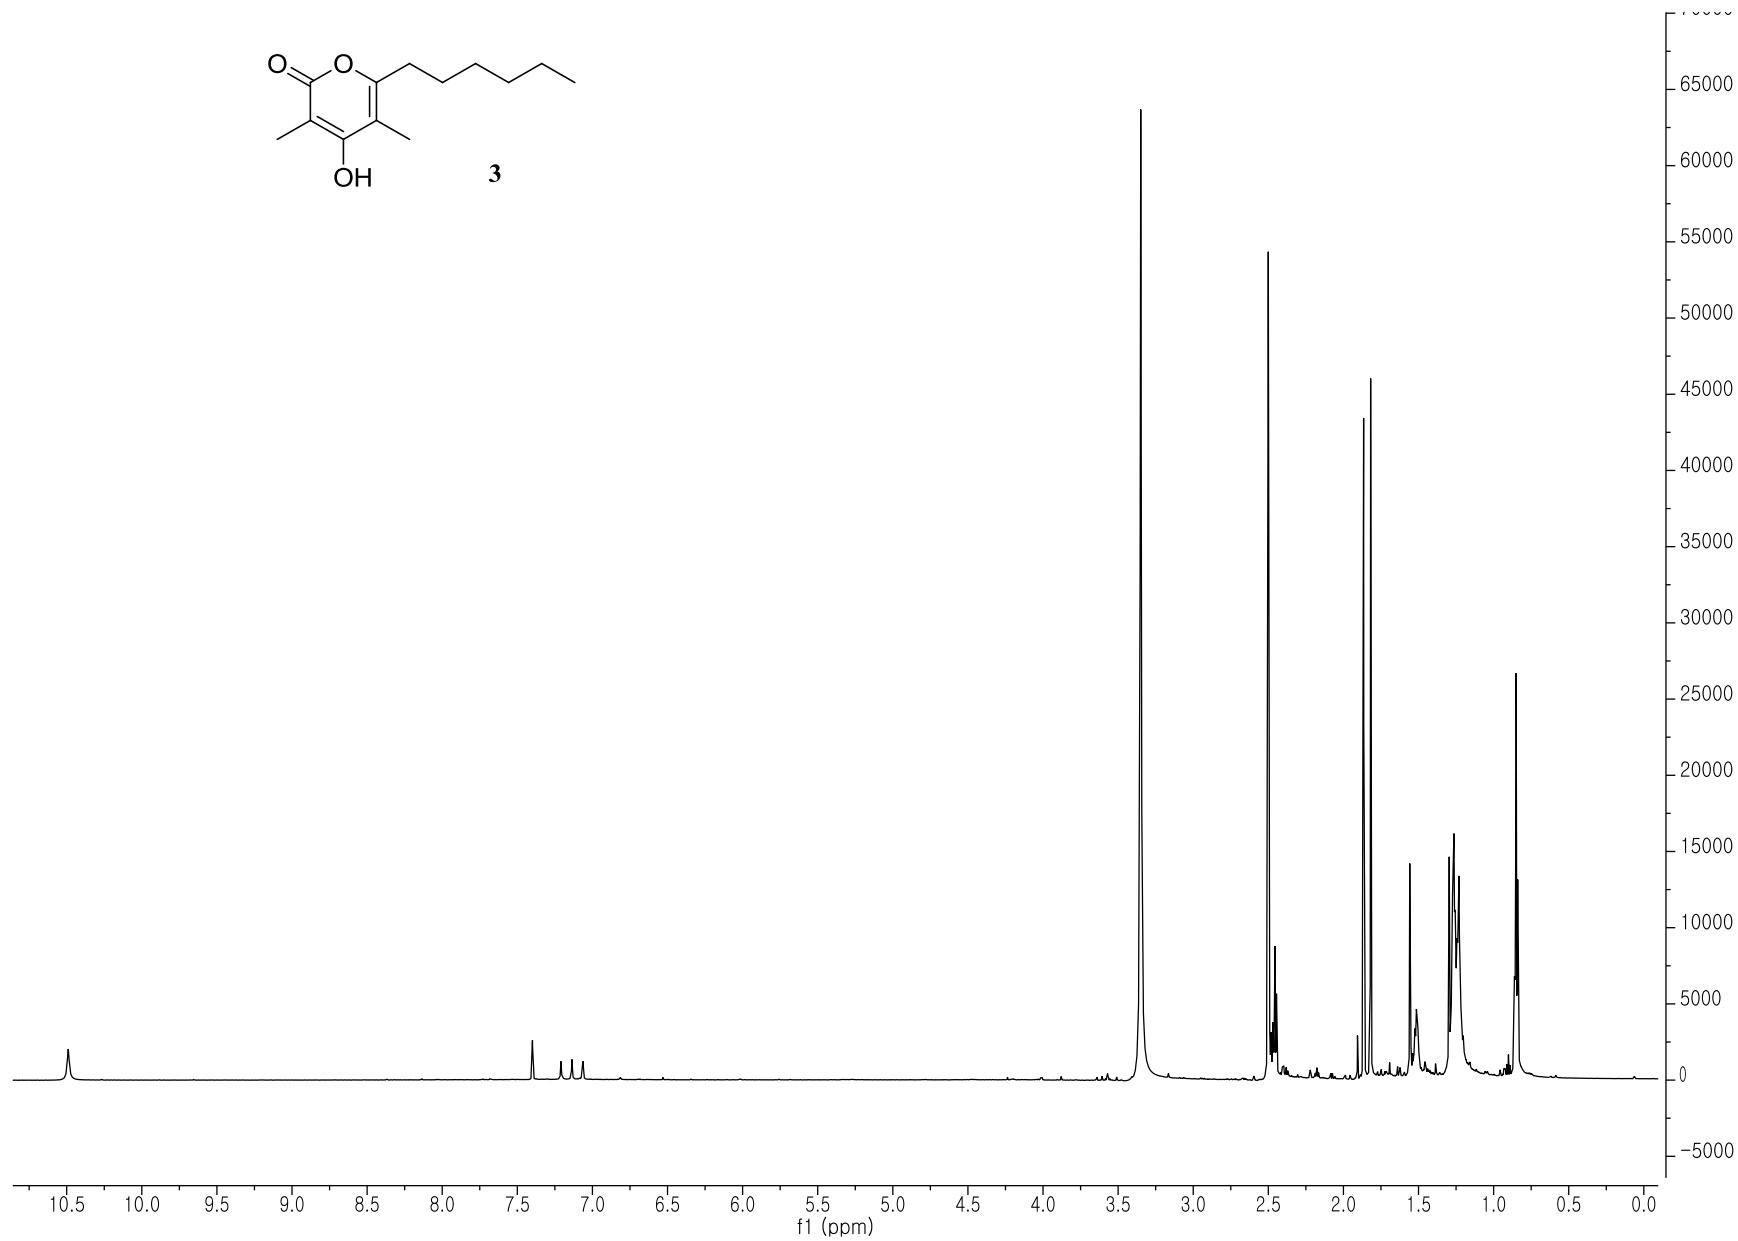

**Figure S12.**  $^{13}\text{C}$  NMR Spectrum (75 MHz) of Saccharomonopyrone C (**3**) in  $\text{DMSO-}d_6$

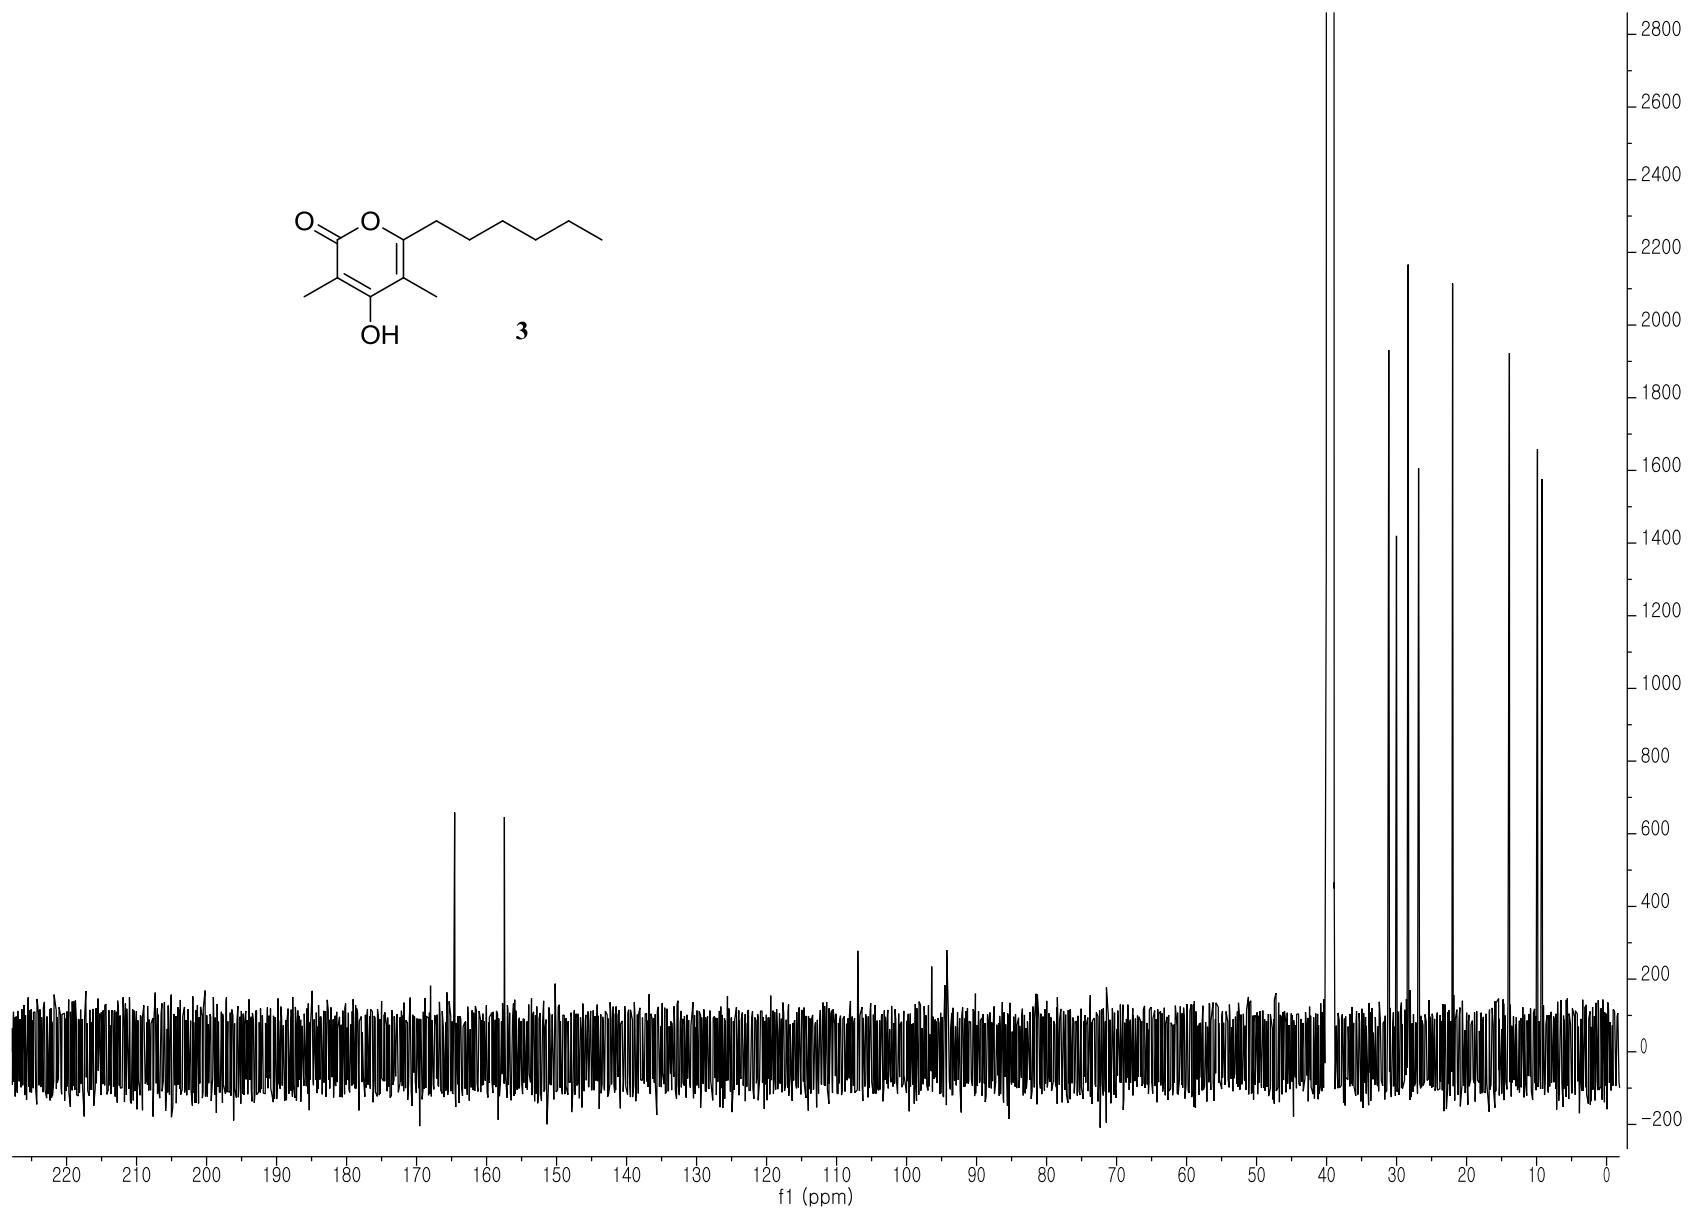

**Figure S13.** gCOSY Spectra (500 MHz) of Saccharomonopyrone A (**3**) in DMSO-*d*<sub>6</sub>

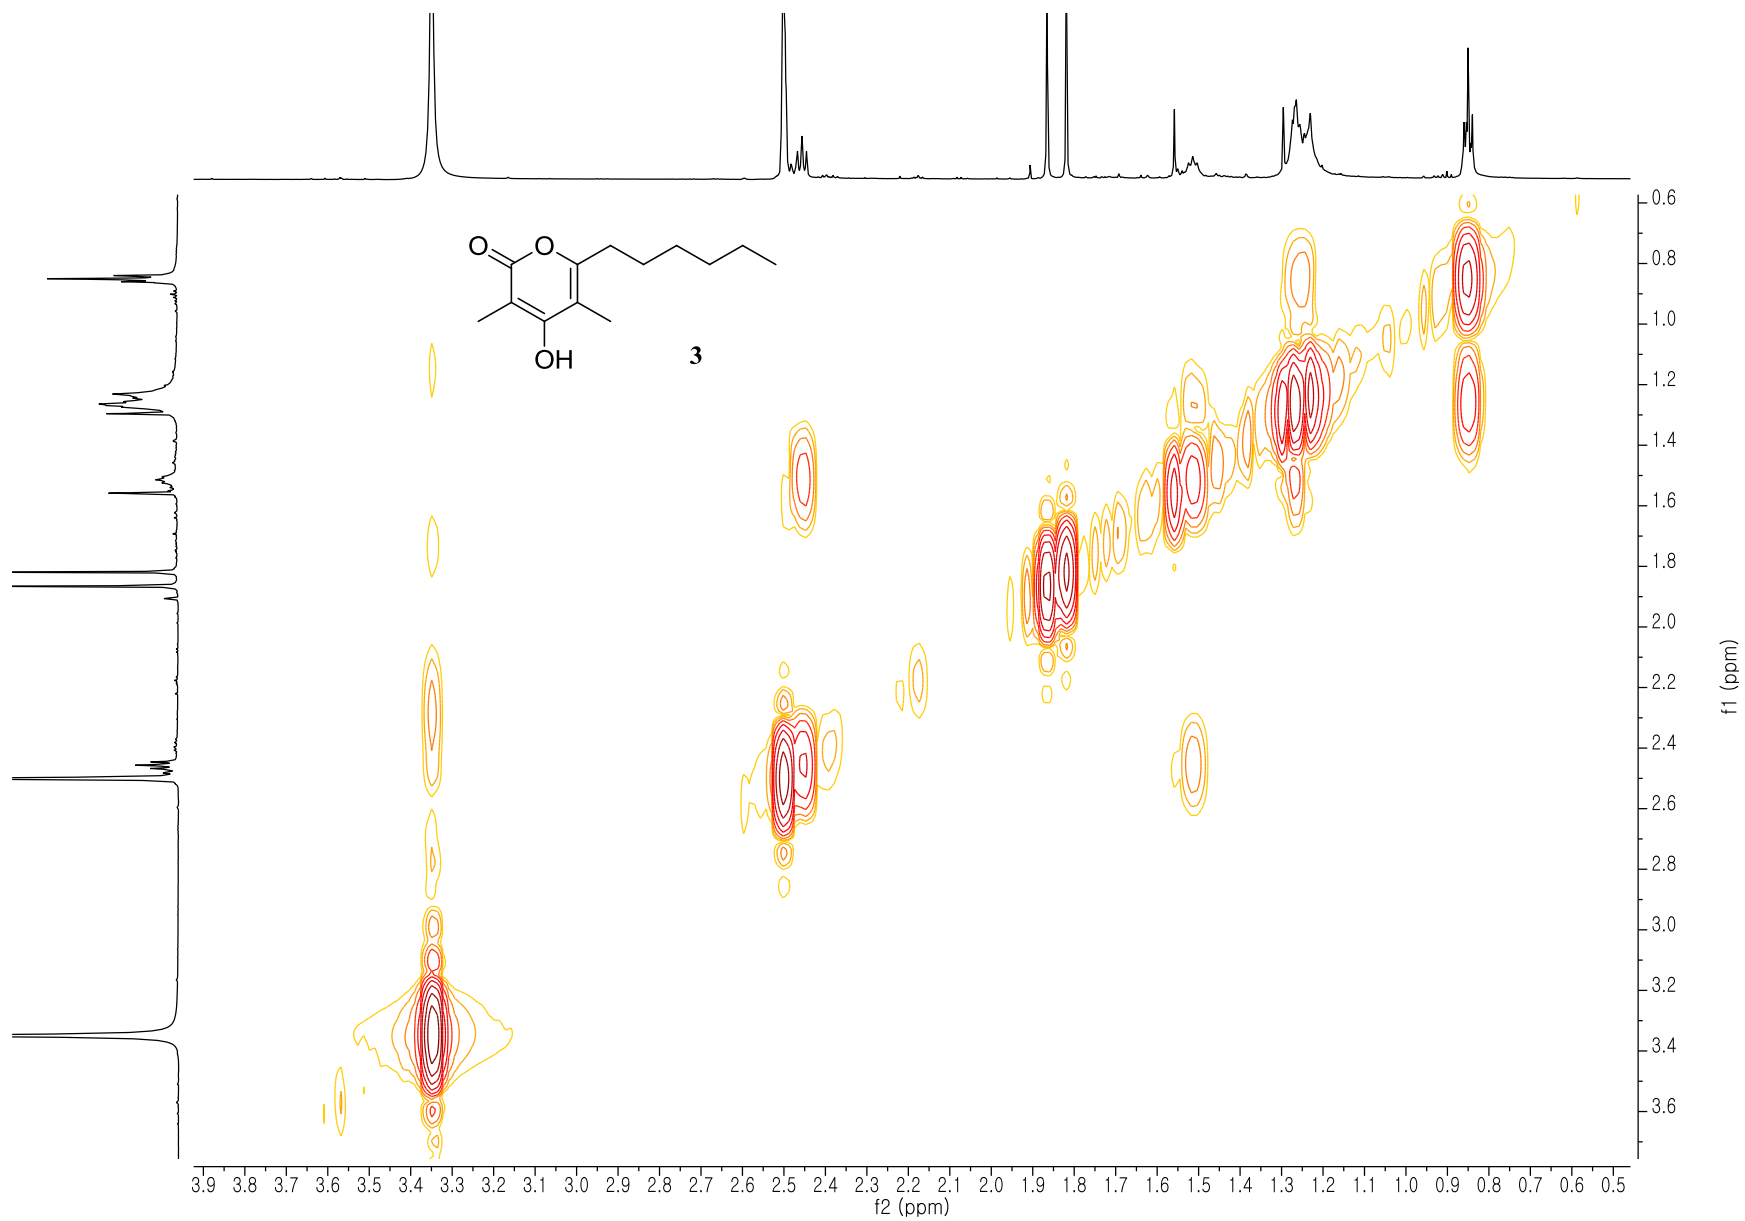

Figure S14. gHSQC Spectra (500 MHz) of Saccharomonopyrone A (**3**) in DMSO-*d*<sub>6</sub>

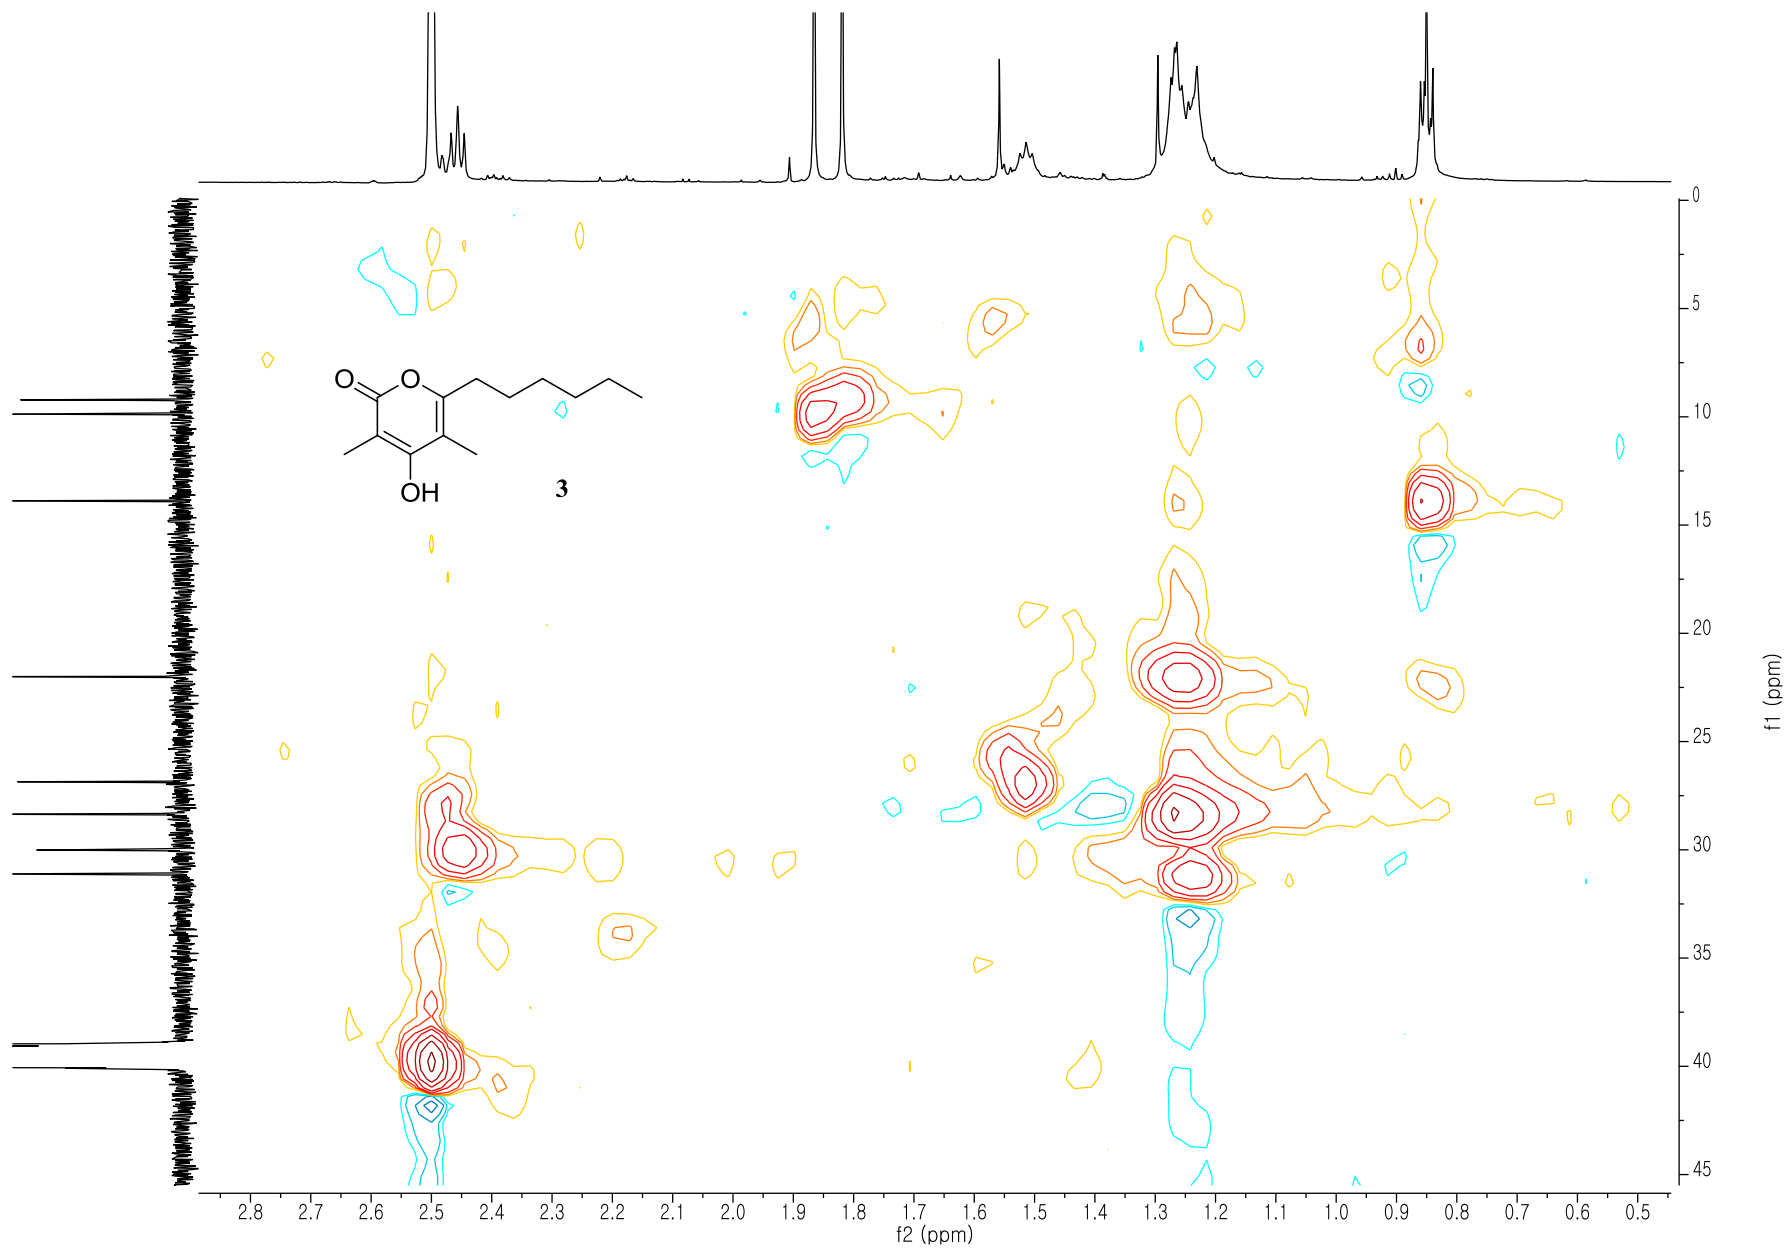



Figure S15. gHMBC Spectra (500 MHz) of Saccharomonopyrone A (**3**) in DMSO- $d_6$

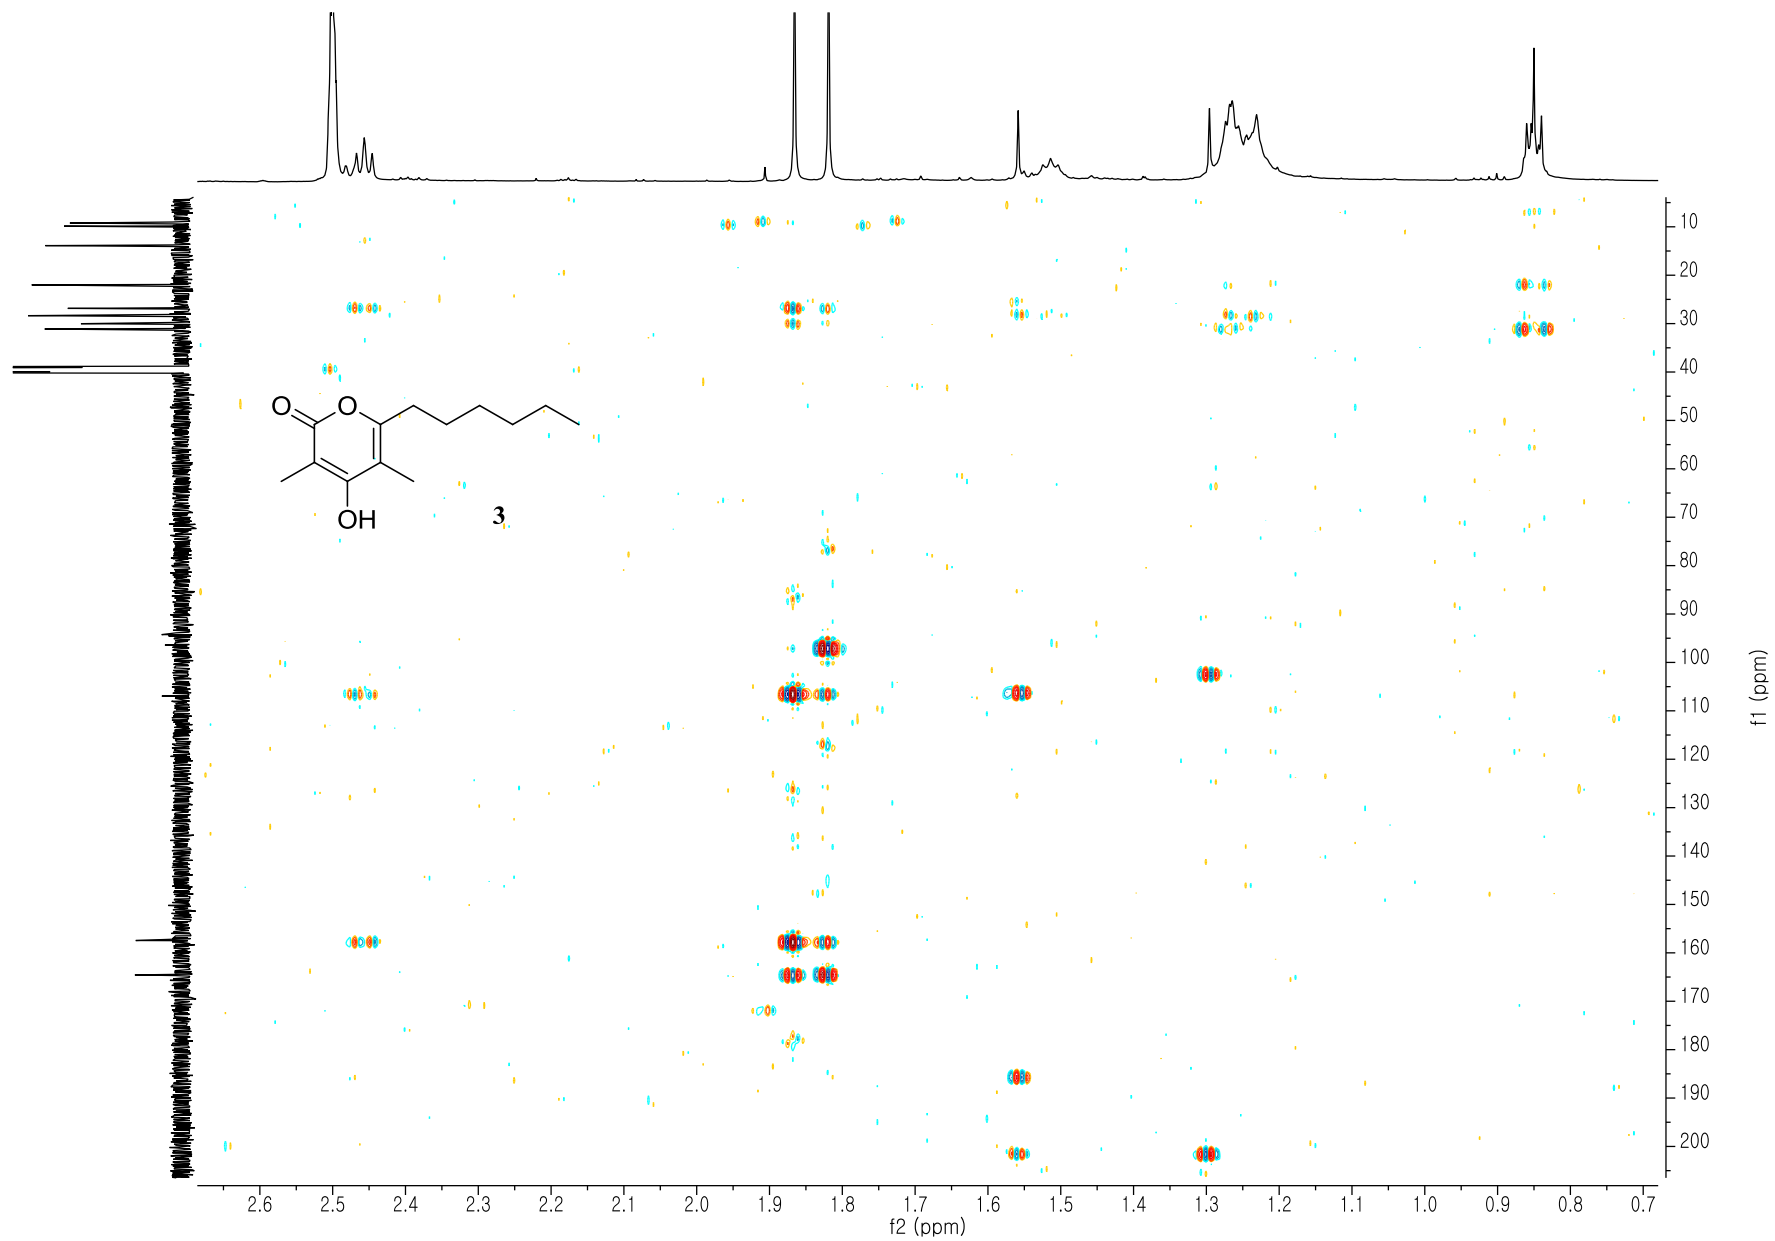

**Figure S16.** UV spectra of Saccharomonopyrones.

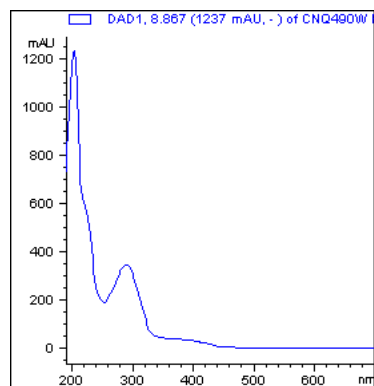

Saccharomonopyrone A

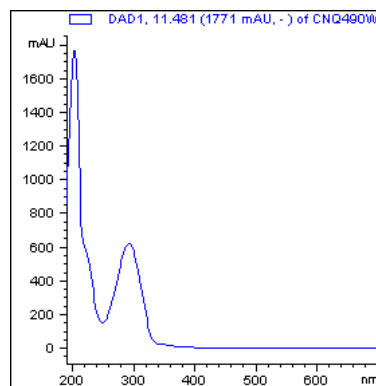

Saccharomonopyrone B

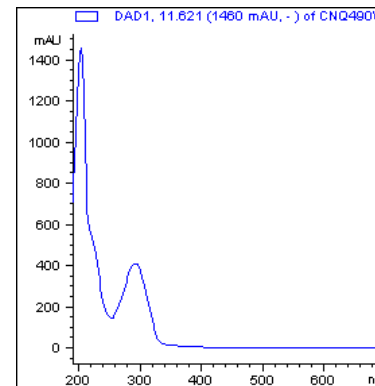

Saccharomonopyrone C
